# Supplementary material for: Intent to Vaccinate SARS-CoV-2 Infected Children in US Households: A Survey
Source: MDPI journal article supplement (doi:10.3390/vaccines9091049), 2021-09-21
Supplement: s1 [file s1]

### Supplemental Table S1: Survey questions

1. If a safe and effective vaccine against SARS-CoV-2 becomes available, would you allow it to be given to your child?
  - a. Yes
  - b. No
  - c. Maybe/undecided
    - i. If no/maybe, what are your concerns?
2. If a vaccine against SARS-CoV-2 becomes available, would you allow it to be given to other members in your home including yourself?
  - a. Yes
  - b. No
  - c. Maybe/undecided
    - i. If no/maybe, what are your concerns?
3. If your child is vaccinated, do you believe they will help prevent others from becoming infected?
  - a. Yes
  - b. No
  - c. Maybe
    - i. Vaccination efficacy notes:
4. \*What information have you heard or read about COVID-19? [open ended]
5. \*Where did you read/hear about a COVID-19 vaccine [newspaper/online, social media, other].  
The response "other" triggered further explanation.
6. \*Was the report pro-vaccine, anti-vaccine or both?
7. \*If a vaccine prevents 19 of 20 people against getting COVID-19 disease, would you allow it to be given to your children, including the child who received care.

\*Question was only asked on secondary survey

### Supplemental Table S2: Comparison of first and second survey responses

| Characteristic                                                         | N = 45 <sup>i</sup> |
|------------------------------------------------------------------------|---------------------|
| <b>Whether would vaccinate child</b>                                   |                     |
| <i>Maybe to maybe</i>                                                  | 3 / 45 (6.7%)       |
| <i>Maybe to no</i>                                                     | 1 / 45 (2.2%)       |
| <i>Maybe to yes</i>                                                    | 1 / 45 (2.2%)       |
| <i>No to maybe</i>                                                     | 3 / 45 (6.7%)       |
| <i>No to no</i>                                                        | 8 / 45 (18%)        |
| <i>No to yes</i>                                                       | 4 / 45 (8.9%)       |
| <i>Yes to maybe</i>                                                    | 4 / 45 (8.9%)       |
| <i>Yes to no</i>                                                       | 5 / 45 (11%)        |
| <i>Yes to yes</i>                                                      | 16 / 45 (36%)       |
| <b>Whether would vaccinate other household members, including self</b> |                     |
| <i>Maybe to maybe</i>                                                  | 2 / 45 (4.4%)       |
| <i>Maybe to no</i>                                                     | 1 / 45 (2.2%)       |
| <i>Maybe to yes</i>                                                    | 1 / 45 (2.2%)       |
| <i>No to maybe</i>                                                     | 5 / 45 (11%)        |
| <i>No to no</i>                                                        | 8 / 45 (18%)        |

|                                                                          |                     |
|--------------------------------------------------------------------------|---------------------|
| <i>No to yes</i>                                                         | 4 / 45 (8.9%)       |
| <i>Yes to maybe</i>                                                      | 5 / 45 (11%)        |
| <i>Yes to no</i>                                                         | 3 / 45 (6.7%)       |
| <i>Yes to yes</i>                                                        | 16 / 45 (36%)       |
| <b>Whether vaccinating the child would prevent others from infection</b> | N = 44 <sup>1</sup> |
| <i>Maybe to maybe</i>                                                    | 3 / 44 (6.8%)       |
| <i>Maybe to no</i>                                                       | 1 / 44 (2.3%)       |
| <i>Maybe to yes</i>                                                      | 1 / 44 (2.3%)       |
| <i>No to maybe</i>                                                       | 3 / 44 (6.8%)       |
| <i>No to no</i>                                                          | 3 / 44 (6.8%)       |
| <i>No to yes</i>                                                         | 9 / 44 (20%)        |
| <i>Yes to maybe</i>                                                      | 3 / 44 (6.8%)       |
| <i>Yes to no</i>                                                         | 1 / 44 (2.3%)       |
| <i>Yes to yes</i>                                                        | 20 / 44 (45%)       |
| <sup>1</sup> Statistics presented: n / N (%)                             |                     |
| *1 participant did not answer this question                              |                     |
